# Supplementary material for: Facile fabrication of CdS/CdSe core–shell nanowire heterostructure for solar cell applications
Source: Royal Society of Chemistry journal article supplement (doi:10.1039/c7nj00954b), 2017-01-01
Supplement: c7nj00954b1.pdf [file c7nj00954b1.pdf]

## Supporting Information:-

### Facial fabrication of CdS/CdSe core-shell nanowires heterostructure towards solar cell application

Sutripto Majumder, Babasaheb R. Sankapal\*

*Nanomaterials and device laboratory, Department of Physics, Visvesvaraya National Institute of  
Technology, South Ambazari Road, Nagpur, 440010, M.S. India.*

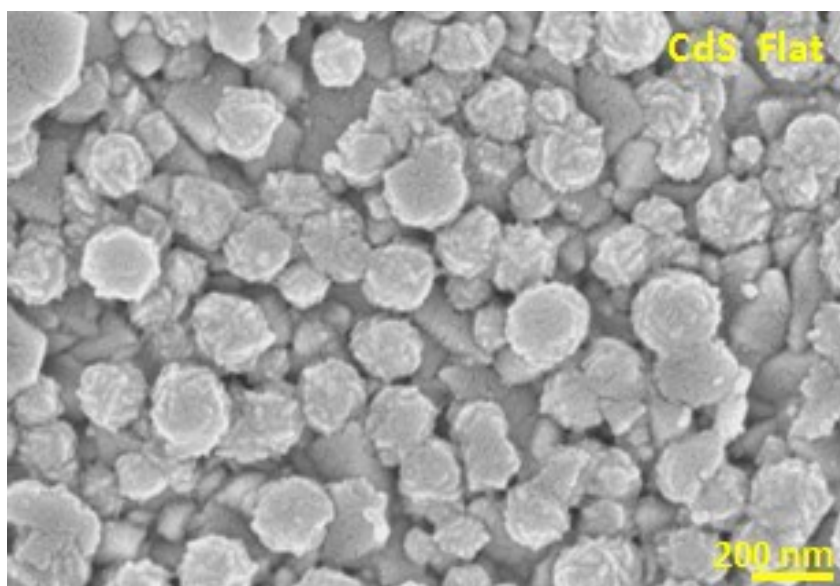

**Figure S1:-** FESEM image of CdS Flat showing uniform nanocauliflower like structure

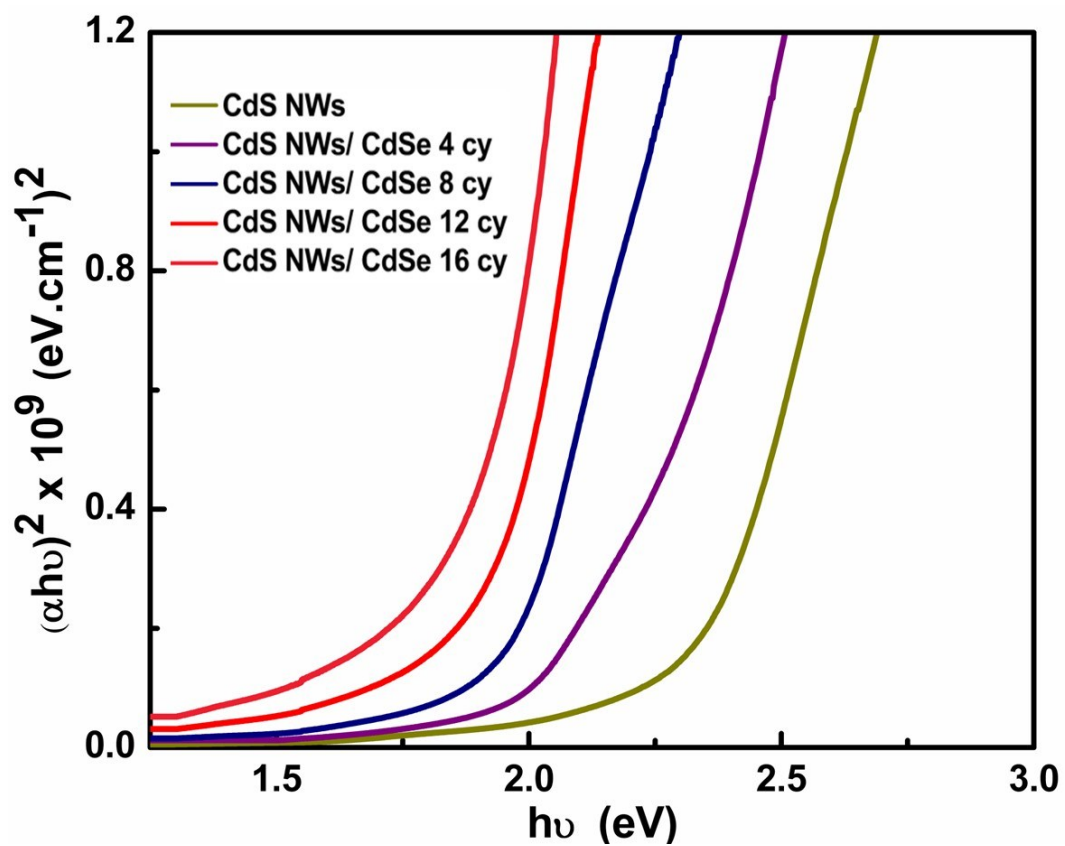

**Figure S2:-**  $(\alpha h\nu)^2$  vs  $h\nu$  curves of bare CdS NWs and CdS/CdSe core-shell NWs structures.

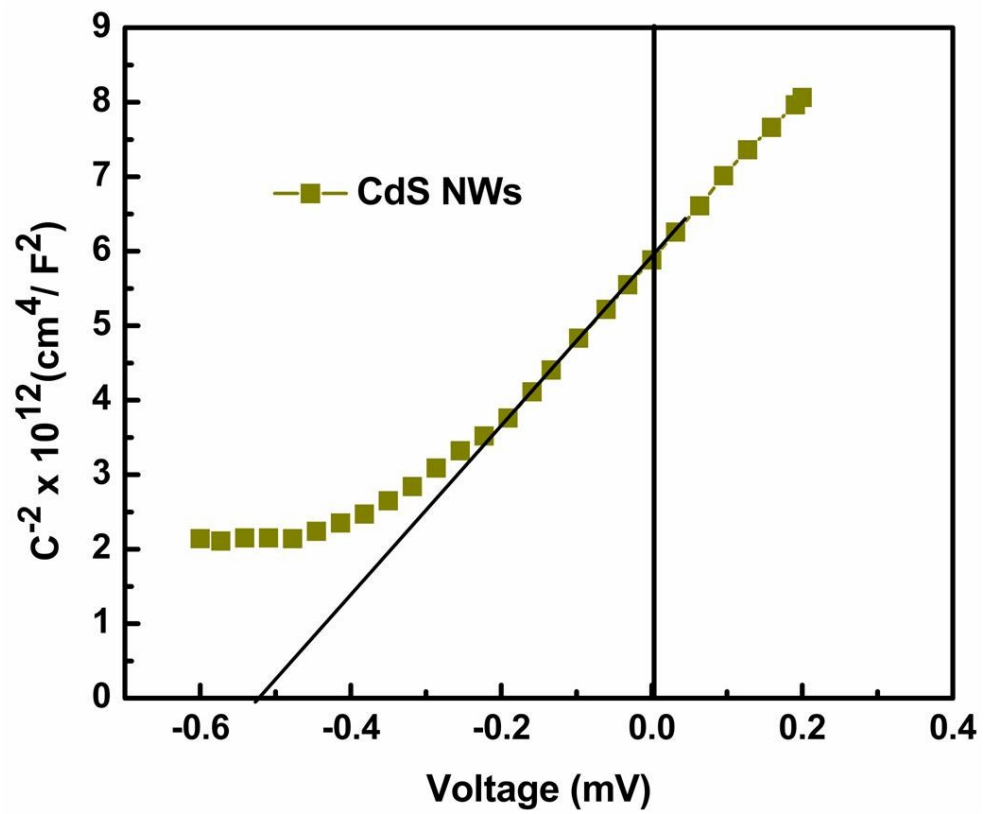

**Figure S3:-** Mott-Schottky of CdS NW photoanode
